# Supplementary material for: Engineering the surface anatomy of an industrially durable NiCo2S4/NiMo2S4/NiO bifunctional electrode for alkaline seawater electrolysis
Source: Royal Society of Chemistry journal article supplement (doi:10.1039/d1ta10850f), 2022-01-01
Supplement: d1ta10850f1.pdf [file d1ta10850f1.pdf]

**Engineering the Surface Anatomy of an Industrially Durable  
NiCo<sub>2</sub>S<sub>4</sub>/NiMo<sub>2</sub>S<sub>4</sub>/NiO Bifunctional electrode for Alkaline Seawater  
Electrolysis**

*Selvaraj Seenivasan, and Do-Heyoung Kim\**

School of Chemical Engineering, Chonnam National University, 300 Youngbong-dong,  
Gwangju 500-757, Republic of Korea

**SUPPORTING INFORMATION**

\*Corresponding author: [kdhh@chonnam.ac.kr](mailto:kdhh@chonnam.ac.kr)

Tel. (office): +82-62-530-1894

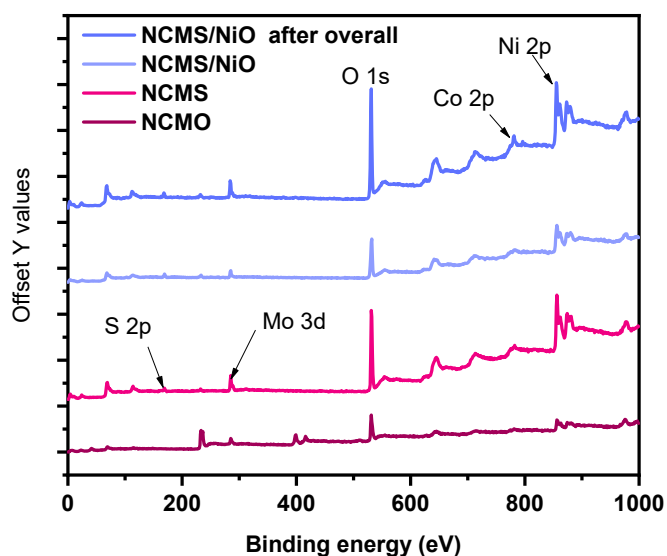

Fig. S1. XPS survey spectra of bare  $(\text{NiCo}_2\text{O}_4/\text{NiMoO}_4)$  NCMO,  $(\text{NiCo}_2\text{S}_4/\text{NiMo}_2\text{S}_4)$  NCMS,  $(\text{NiCo}_2\text{S}_4/\text{NiMo}_2\text{S}_4/\text{NiO})$  NCMS/NiO (before and after overall water splitting for 14 days) electrocatalysts.

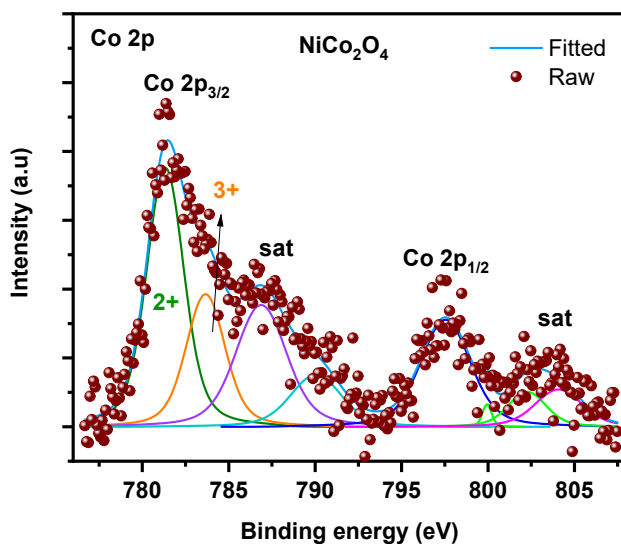

Fig. S2. High resolution Co 2p spectra of  $\text{NiCo}_2\text{O}_4$  sample. There are two main peaks in Co  $2p_{3/2}$  at 783.69 and 781.27 eV, which can be assigned to the 3+ and 2+ states of  $\text{NiCo}_2\text{O}_4$ , respectively.

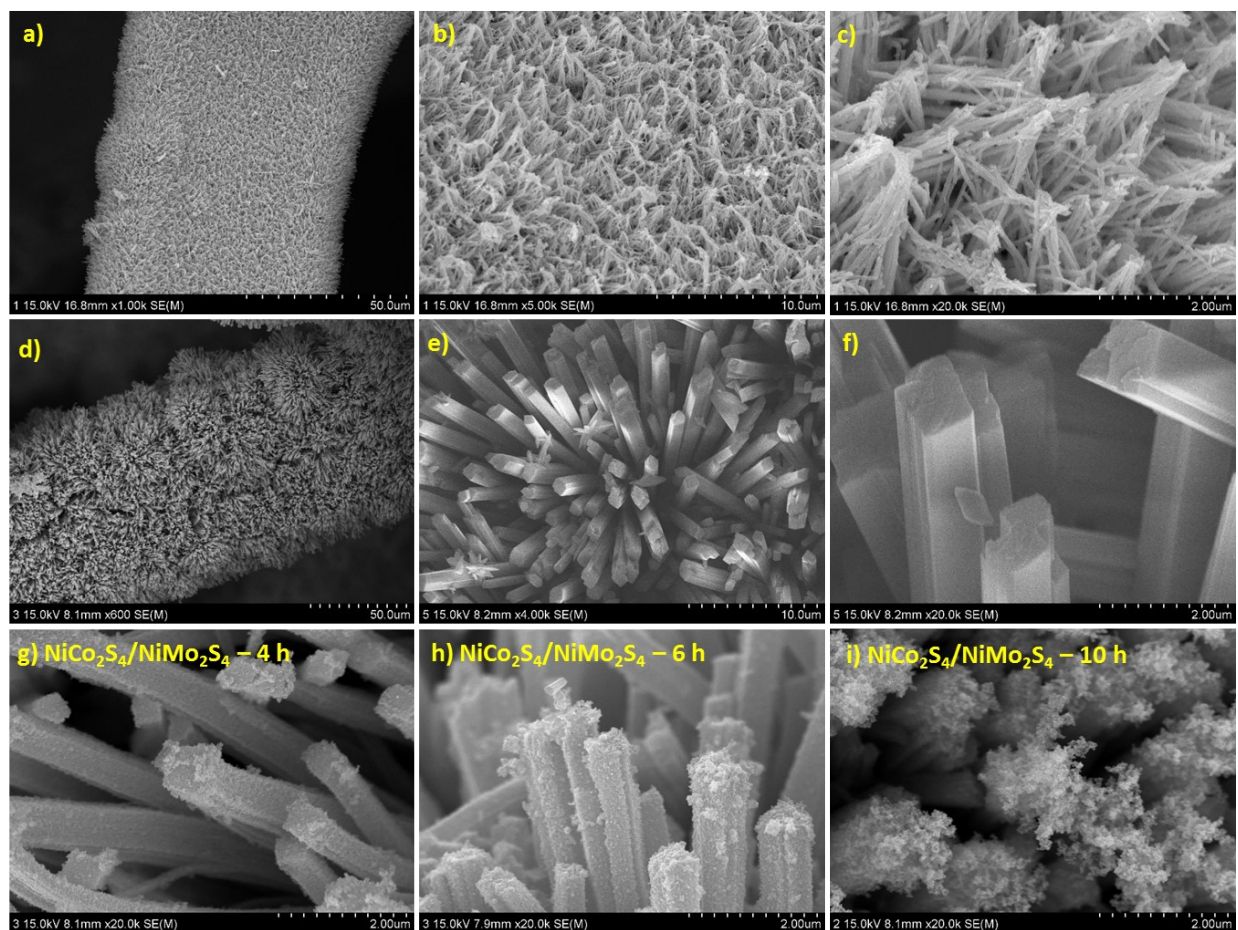

Fig. S3. HR-SEM images of  $\text{NiCo}_2\text{O}_4$  (a-c),  $\text{NiCo}_2\text{O}_4/\text{NiMoO}_4$  (d-f) and  $\text{NiCo}_2\text{S}_4/\text{NiMo}_2\text{S}_4$  derived with three different anion exchange reaction duration (g-i)

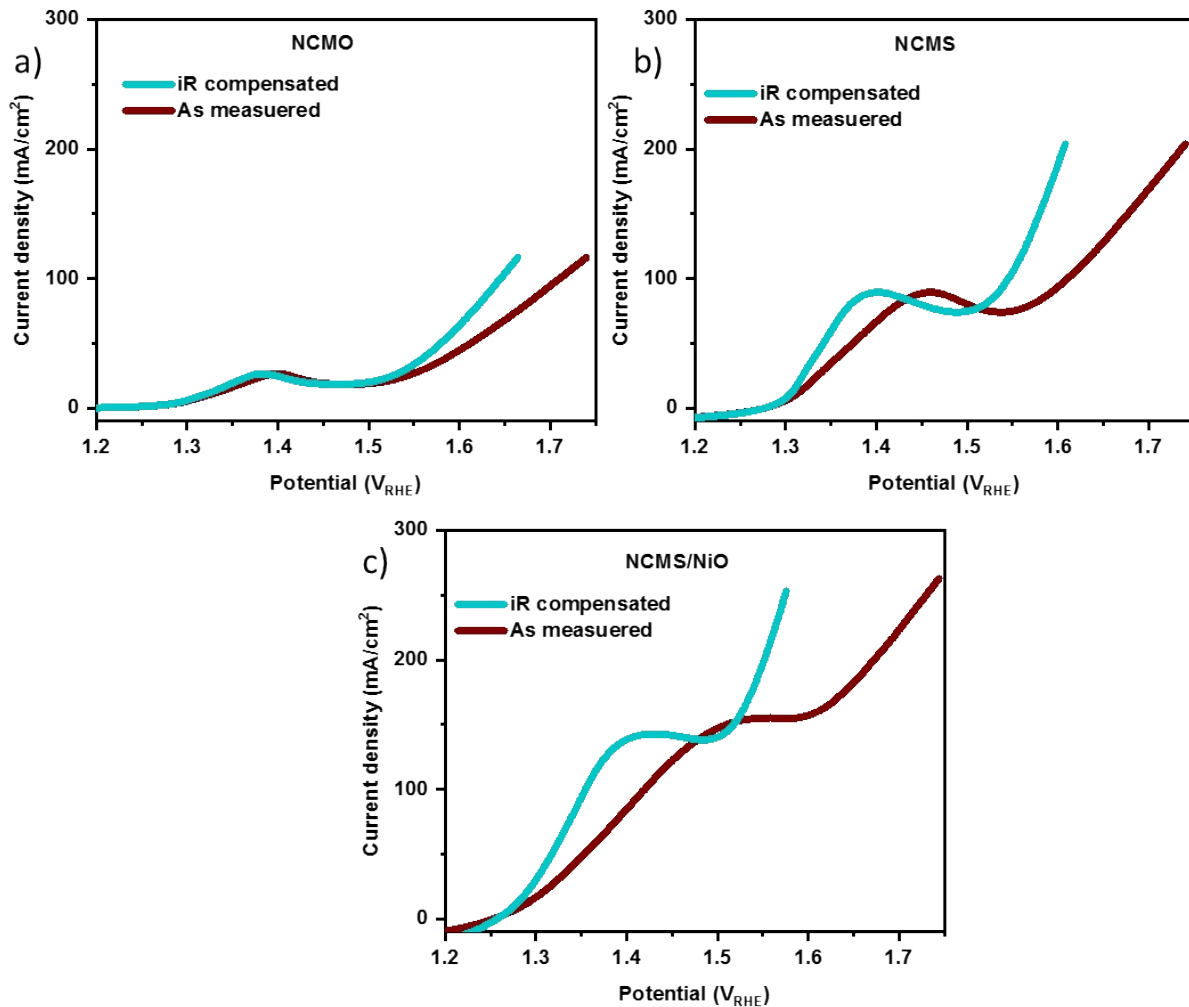

Fig. S4. (a-c) OER half-cell forward sweep LSV curves with and without iR compensation.

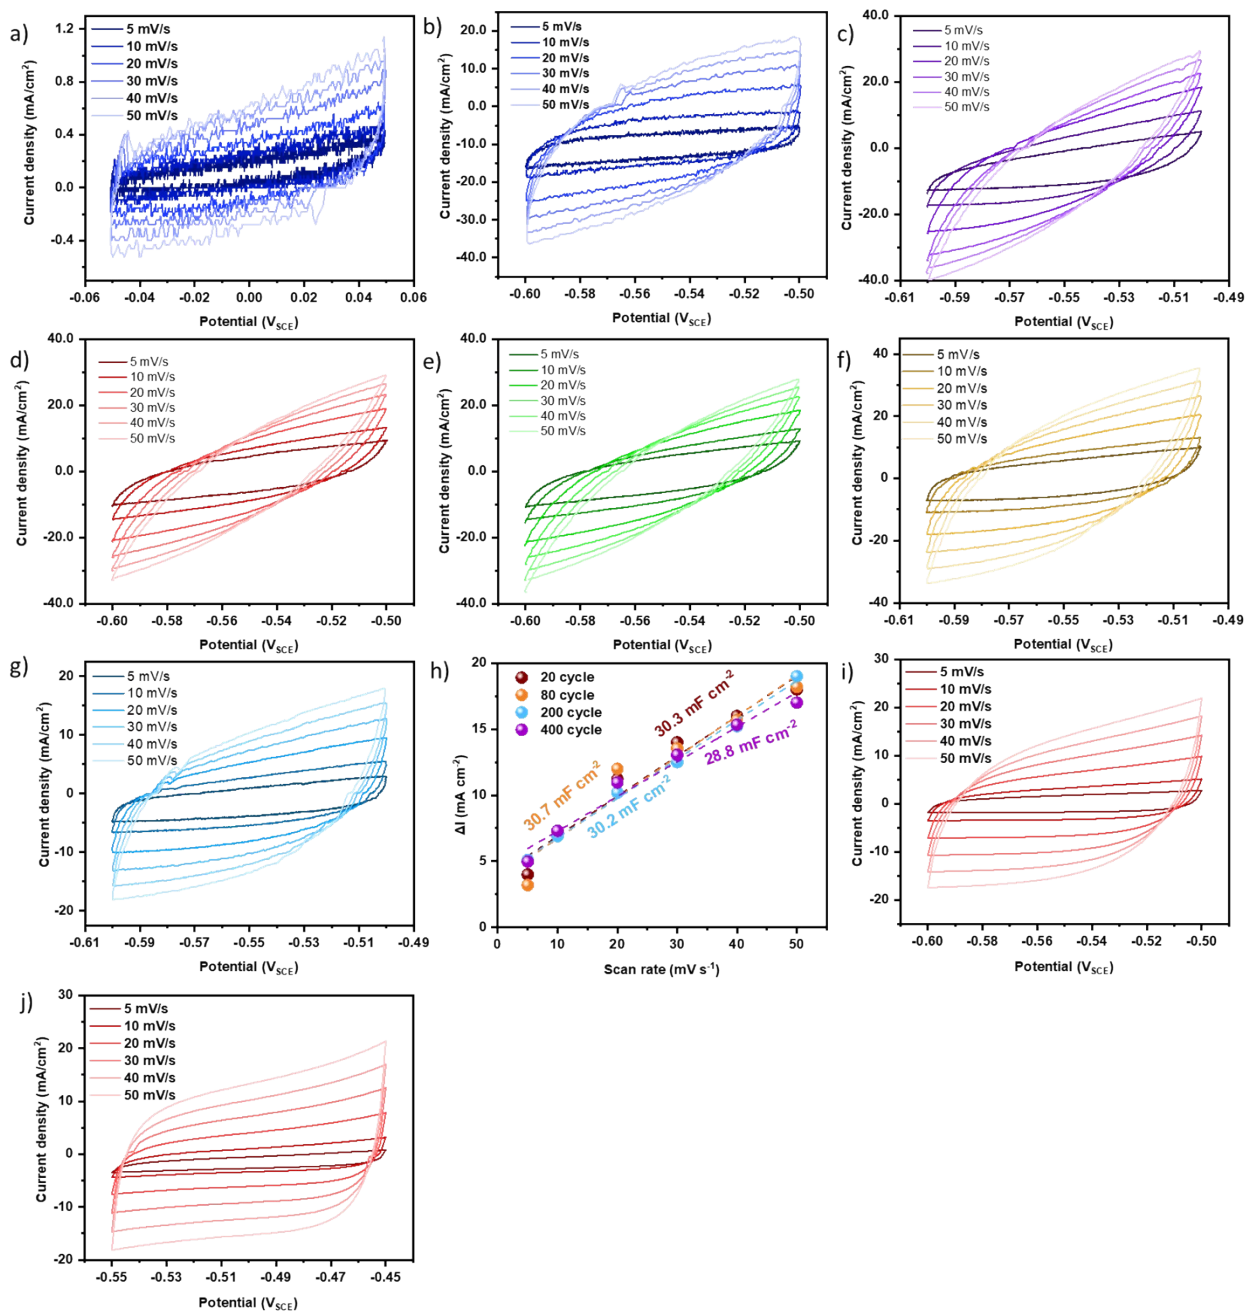

Fig. S5. CV measurements at scan rate of 5, 10, 20, 30, 40 and 50 mV/s in 1 M KOH. a) NCMO, b) NCMS, and NCMS/NiO with various number NiO ALD cycles c) 20, d) 40, e) 80, f) 200 and g) 400. h) Estimation of double-layer capacitance ( $C_{dl}$ ) by plotting the variation in current density ( $\Delta I = (I_a - I_c)/2$ ) versus the scan rate. CV measurements at scan rate of 5, 10, 20, 30, 40 and 50 mV/s in 1 M KOH. i) used NCMS/NiO OER electrode and j) used NCMS/NiO HER electrode.

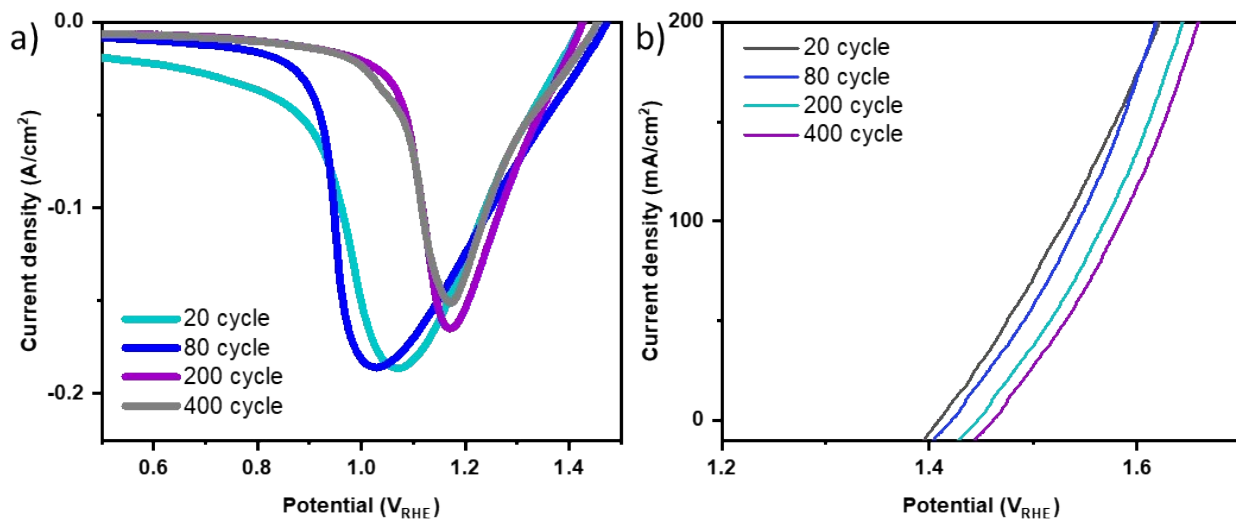

Fig. S6. a) Reduction peak (from CV curves) of NCMS/NiO at 100 mV/s scan rate with various number of NiO ALD cycles (20, 80, 200 and 400), and b) corresponding reverse sweep LSV curves (iR compensated).

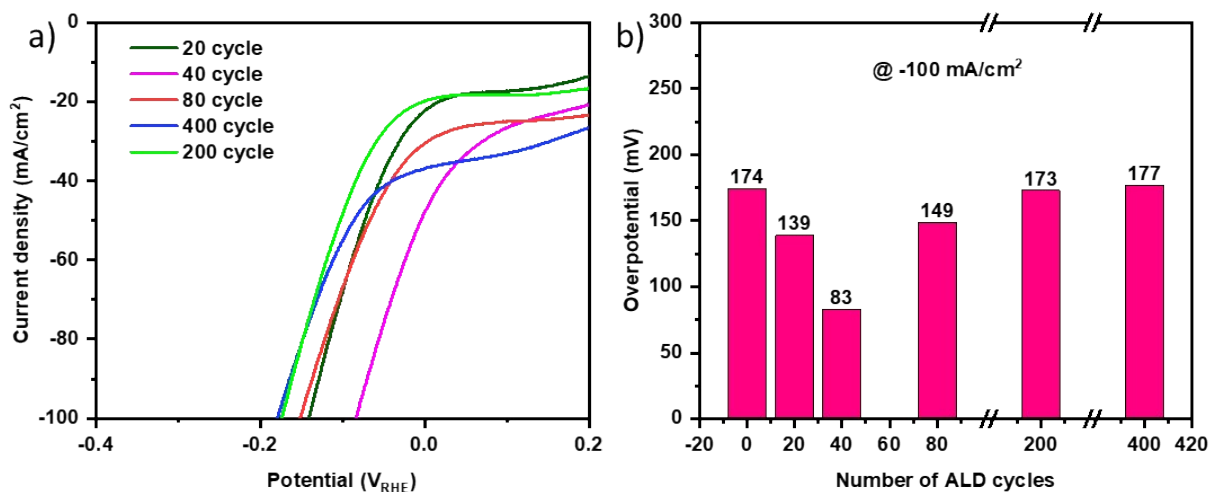

Fig. S7. a) LSV (iR compensated) curves in HER half-cell with respect to number of ALD cycles, b) corresponding overpotential required for -100 mA/cm<sup>2</sup>.

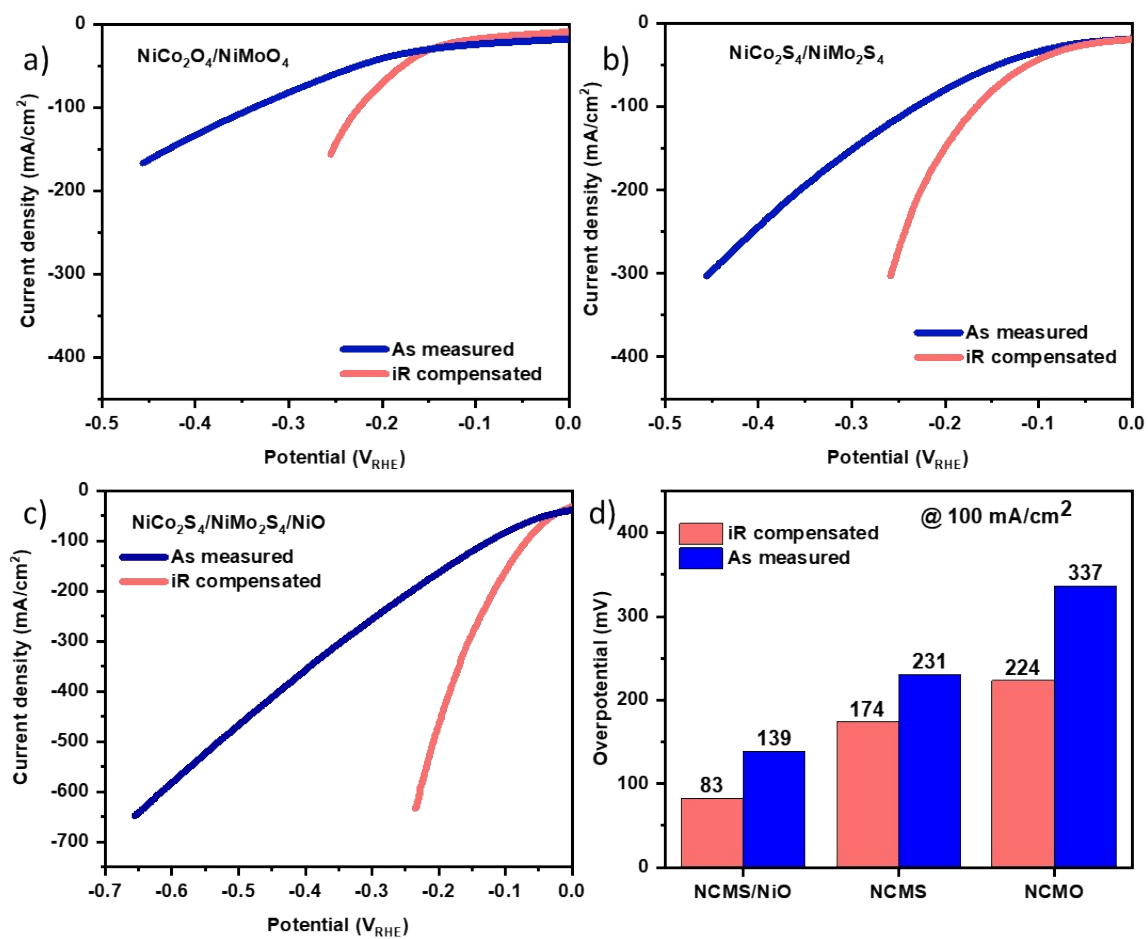

Fig. S8. HER half-cell LSV curves with and without iR compensation (a-c) and the overpotential comparison of all three catalysts at  $-100 \text{ mA}/\text{cm}^2$  current density in 1 M KOH electrolyte.

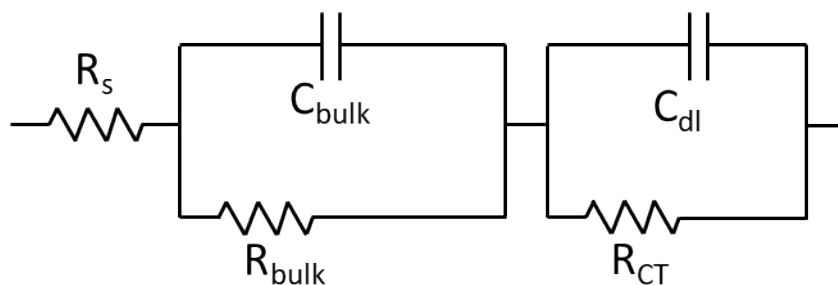

Fig. S9. Electronic circuit used to fit the impedance data.

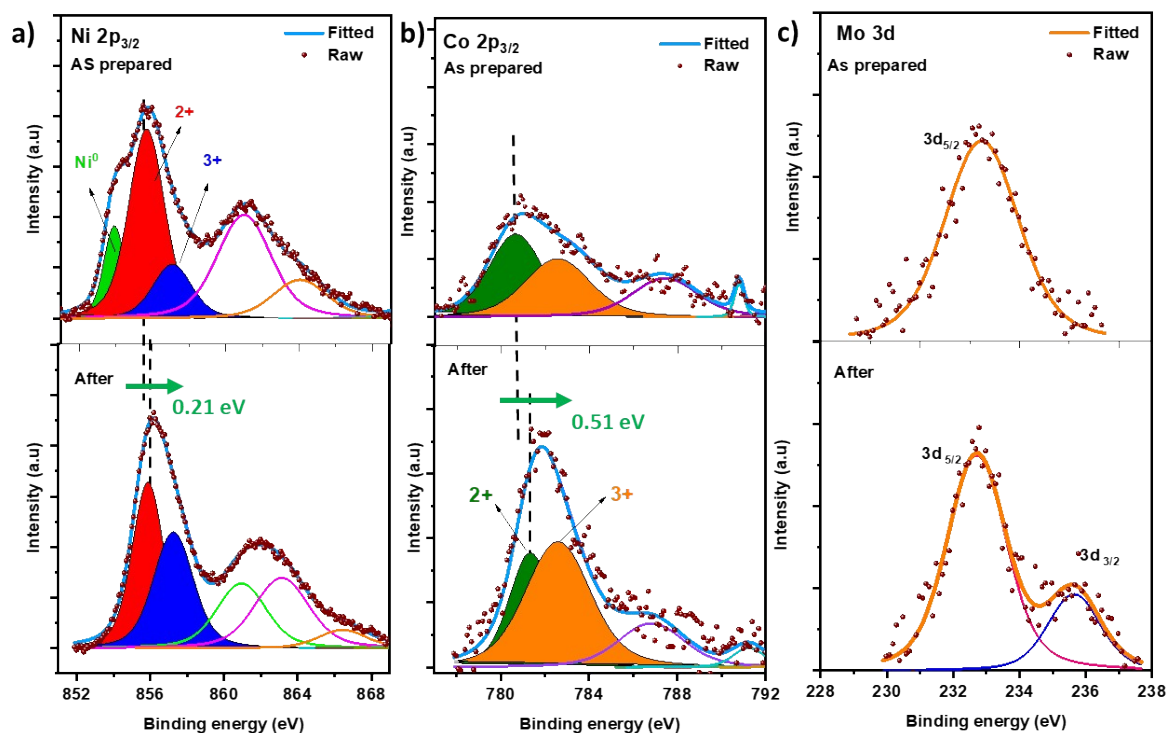

Fig. S10. Comparison of high-resolution XPS profile for a) Ni 2p<sub>3/2</sub>, b) Co 2p<sub>3/2</sub>, and c) Mo 3d of NCMS/NiO before and after 7 consecutive LSV curves (anodic sweep from 1.0 V<sub>RHE</sub> to 1.8 V<sub>RHE</sub>, 5 mV s<sup>-1</sup>).

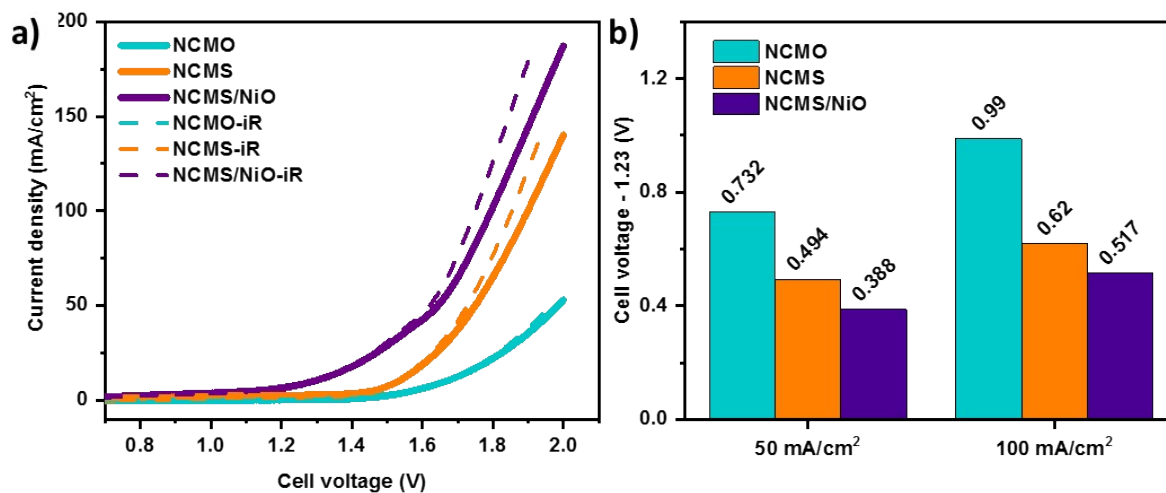

Fig. S11. a) LSV curves of NCMO, NCMS, and NCMS/NiO electrocatalysts in two electrode cell, for overall water splitting in 1 M KOH electrolyte. b) Comparison of overpotential required



(additional to the thermodynamic requirement of 1.23 V) to deliver 50 and 100 mA/cm<sup>2</sup> current densities with iR compensation.

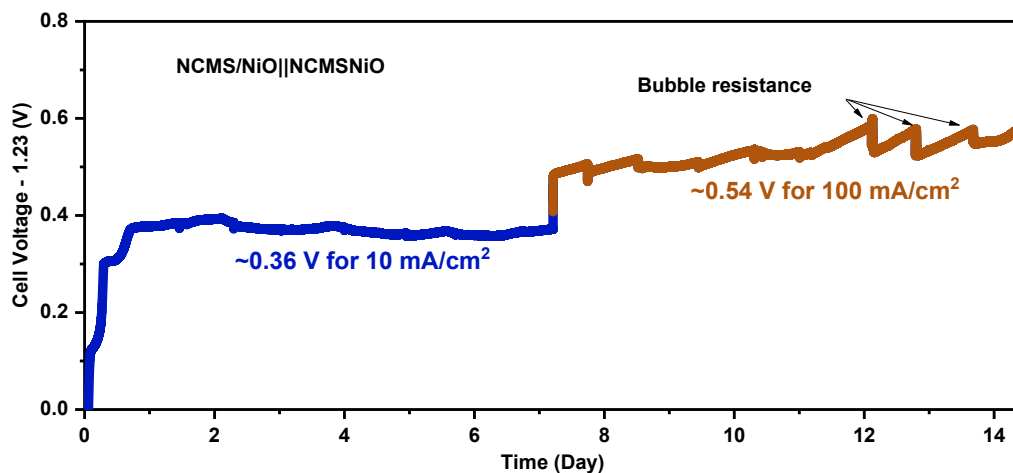

Fig. S12. Chronopotentiometry of NCMS/NiO catalysts in the overall water splitting (1 M KOH + DI water) for 14 days (1-7 days at 10 mA/cm<sup>2</sup> and 8-14 days at 100 mA/cm<sup>2</sup>).

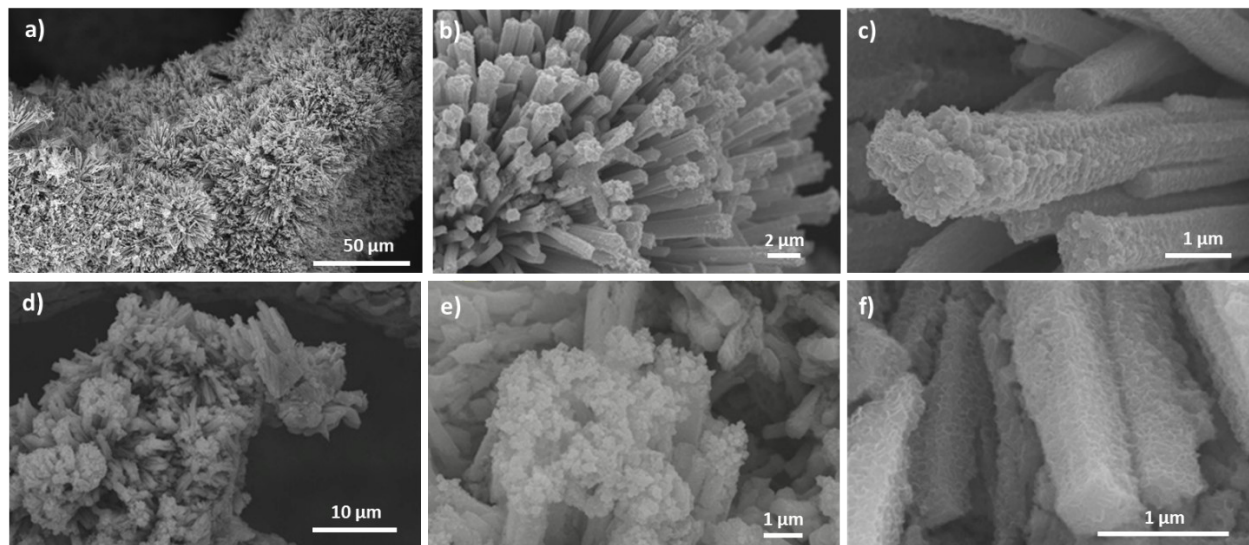

Fig. S13. The HR-SEM images of NCMS/NiO electrocatalyst after overall water splitting for 14 days (first week at 10 mA/cm<sup>2</sup> and second week at 100 mA/cm<sup>2</sup>): a-c) OER electrode and d-f) HER electrode.

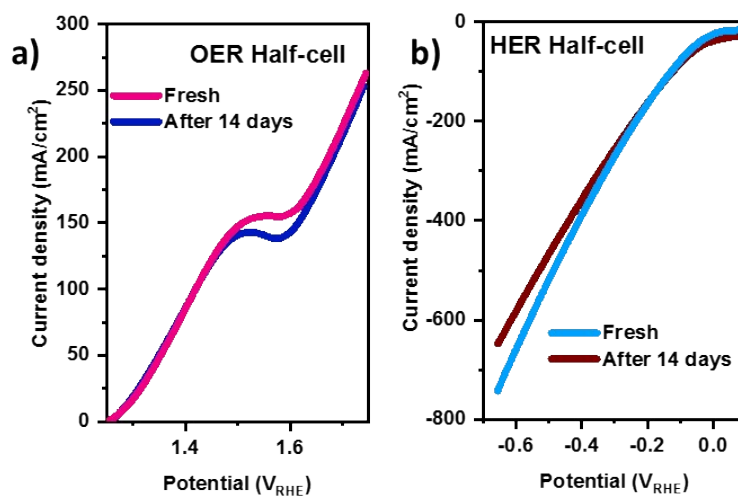

Fig. S14. Comparison LSV curves (iR uncompensated) of NCMS/NiO catalysts before and after the CA test: a) OER half-cell, b) HER half-cell.

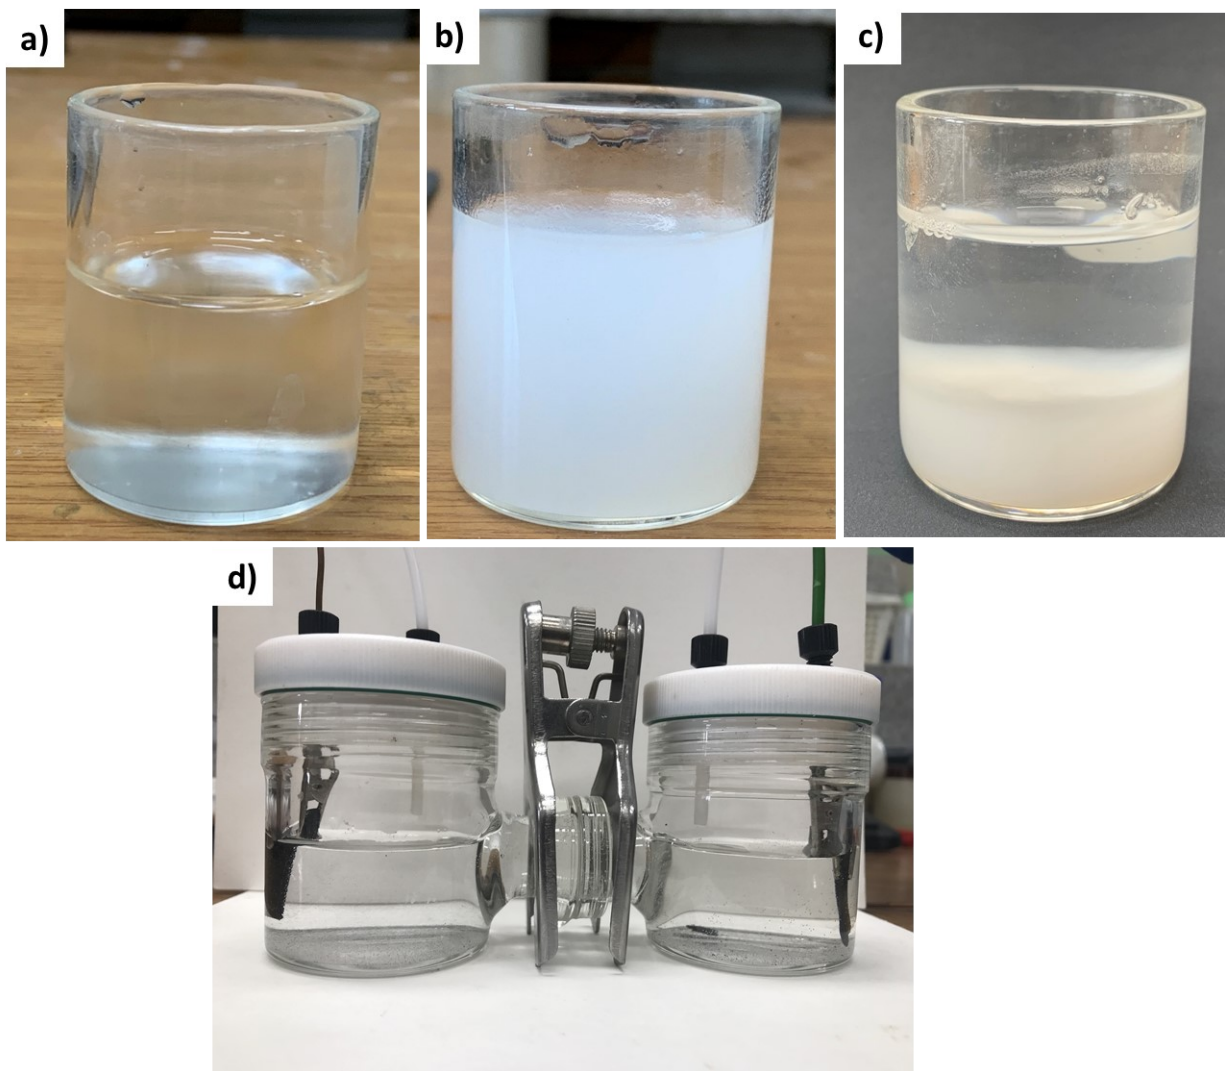

Fig. S15. Digital photographs of a) raw sea water after simple filtration to remove debris and fine sand particles, b) 1 M KOH in sea water, and c) insoluble  $\text{Mg}(\text{OH})_2/\text{Ca}(\text{OH})_2$  and  $\text{CaCO}_3$  particles settled at the bottom of the beaker after an hour. d) Digital image of industrial seawater electrolyzer cell at 80 °C.

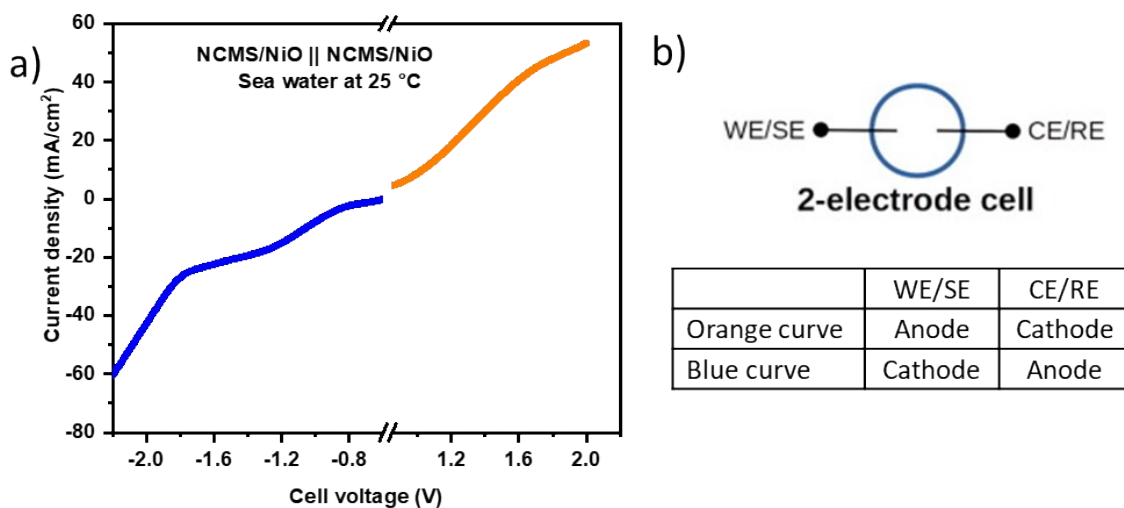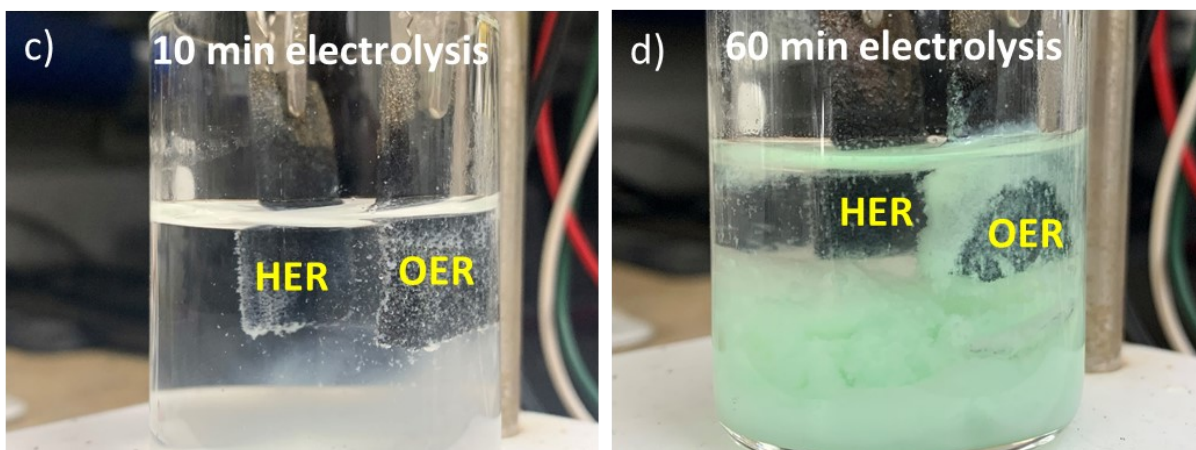

Fig. S16. a) LSV of NCMS/NiO || NCMS/NiO overall water splitting cell in raw sea water electrolyzer (pH ~ 8.1). Orange and blue curve indicated the current density measured at the anode and cathode, respectively. b) Cell configuration used to obtain the orange and blue LSV curves. WE is working, SE is working sense, CE is counter and RE is reference electrode connecting terminals of the potentiostat. c) Digital image of electrolyzer after 10 min of continuous electrolysis at 50 mA/cm<sup>2</sup> current density. The formation of insoluble particles over electrodes can be seen. After 60 min (d) the anode severely covered by the insoluble particles.

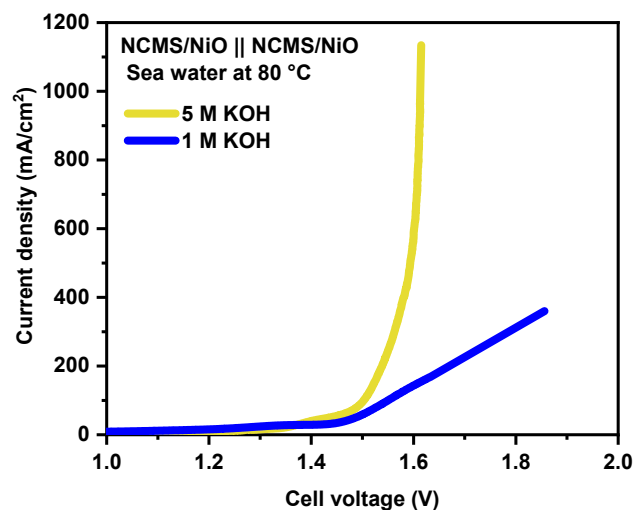

Fig. S17. Linear sweep voltammetry of NCMS/NiO || NCMS/NiO overall water splitting cell in industrial sea water electrolyzer with iR compensation.

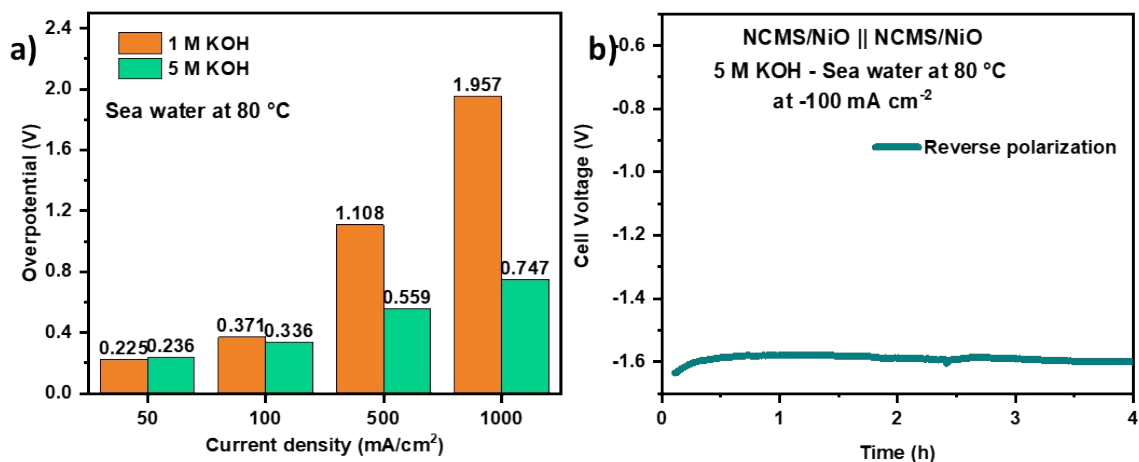

Fig. S18. a) Comparison of total overpotentials achieved by NCMS/NiO||NCMS/NiO electrolyzer under reverse polarization. b) Chronopotentiometric response recorded by using reversely polarized NCMS/NiO electrodes at  $-100 \text{ mA/cm}^2$  for 4 h.

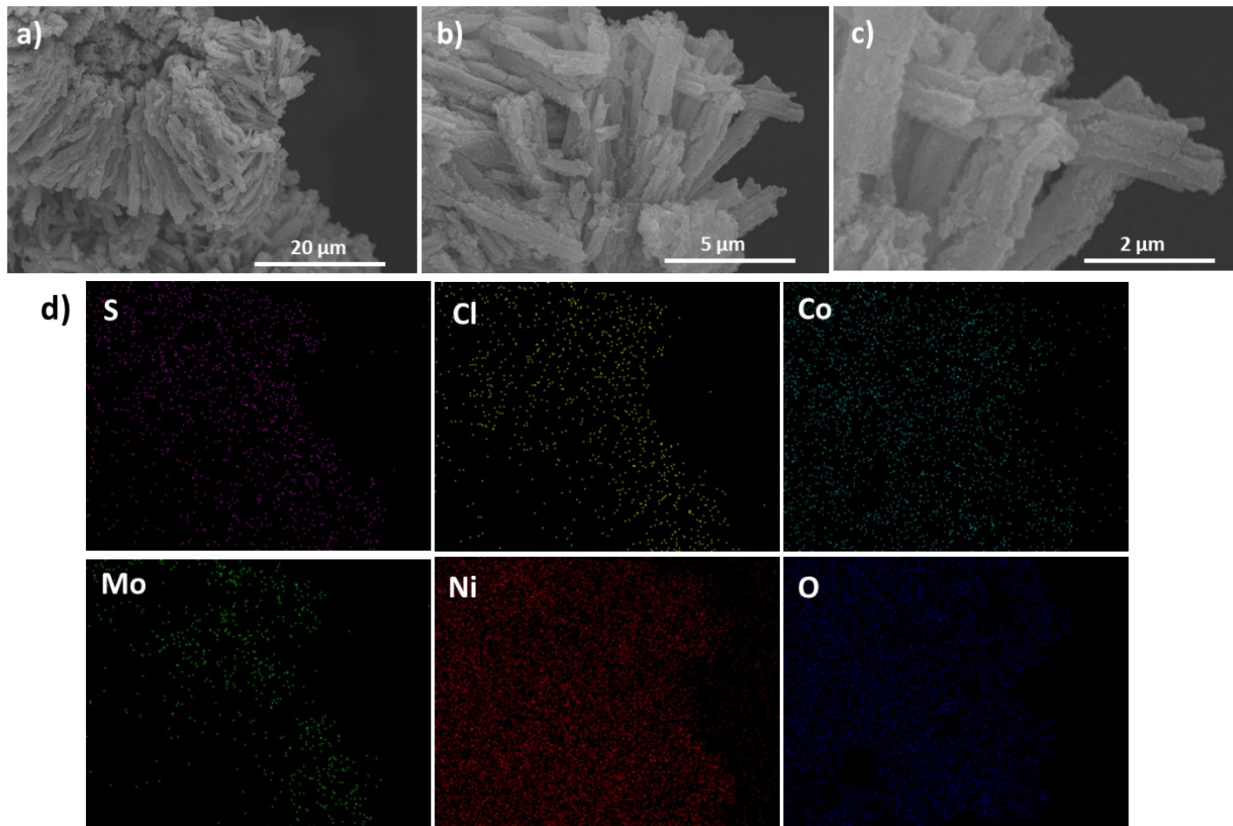

Fig. S19. The HR-SEM images (a-c) of HER electrode after industrial water splitting for 30 days and corresponding elemental analysis (d).

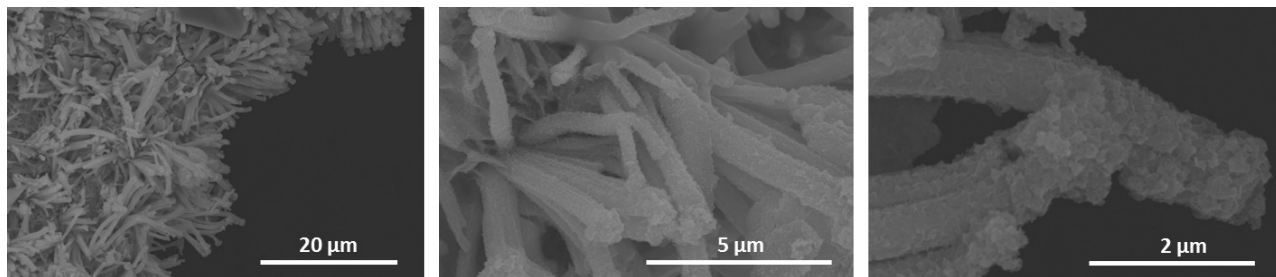

Fig. S20. a-c) The HR-SEM images of OER electrode after overall seawater splitting at 10 mA/cm<sup>2</sup> current density and 25 °C.

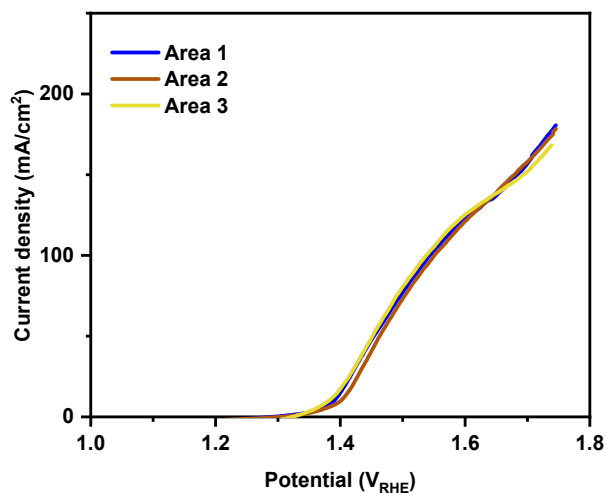

Fig. S21. LSV curves (without  $iR$  compensation) of the areas mentioned in Fig. 10(a) in the manuscript for the OER half-cell (1 M KOH + DI water, at 25 °C).

**Table S1.** Atomic percentage of each element from XPS measurements.

| Electrocatalyst | Ni   | Co   | Mo   | O    | S   |
|-----------------|------|------|------|------|-----|
| NCO             | 10.6 | 21.8 | -    | 67.6 | -   |
| NCMO            | 13.8 | 0.0  | 13.8 | 70.5 | -   |
| NCMS            | 23.0 | 2.8  | 1.0  | 65.6 | 7.6 |
| NCMS/NiO        | 23.7 | 0.9  | 0.8  | 67.7 | 7.0 |

**Table S2.** The calculated double layer capacitance ( $C_{dl}$ ) and ECSA from CV measurements of NCMO, NCMS, and NCMS/NiO-X (X= number of ALD cycles) in 1 M KOH.

| Electrocatalyst | $C_{dl}$ (mF cm <sup>-2</sup> ) | ECSA (cm <sup>2</sup> ) |
|-----------------|---------------------------------|-------------------------|
| NCMO            | 3.1                             | 77                      |
| NCMS            | 26.9                            | 672                     |

|              |      |     |
|--------------|------|-----|
| NCMS/NiO-20  | 30.3 | 757 |
| NCMS/NiO-40  | 30.8 | 770 |
| NCMS/NiO-80  | 30.7 | 767 |
| NCMS/NiO-200 | 30.2 | 755 |
| NCMS/NiO-400 | 28.8 | 720 |

**Table S3.** Summary of recent reports on OER and HER half-cell performance in 1 M KOH electrolyte with fresh water/deionized water. All overpotentials for 10 mA/cm<sup>2</sup> current density except specially mentioned.

| S.No | Catalyst                                                                        | HER overpotential (mV)         | OER overpotential (mV)         | Stability (h) | Ref       |
|------|---------------------------------------------------------------------------------|--------------------------------|--------------------------------|---------------|-----------|
| 1    | NiCo <sub>2</sub> S <sub>4</sub> /NiMo <sub>2</sub> S <sub>4</sub> /<br>ALD-NiO | 20                             | 186                            | 336           | This work |
|      |                                                                                 | 83 for 100 mA/cm <sup>2</sup>  | 263 for 100 mA/cm <sup>2</sup> |               |           |
| 2    | NiCo <sub>2</sub> S <sub>4</sub> /NiS                                           | 203 for 100 mA/cm <sup>2</sup> | 264 for 100 mA/cm <sup>2</sup> | 240           | 1         |
| 3    | NiMoN                                                                           | 38                             | 290 for 50 mA/cm <sup>2</sup>  | 50            | 2         |
| 4    | NiMoN                                                                           | 22                             | 230                            | 36            | 3         |
| 5    | NiMoN/Ni <sub>3</sub> N                                                         | 28                             | -                              | 24            | 4         |
| 6    | NiMoN/Ni <sub>3</sub> N                                                         | 37                             | 277                            | 20            | 5         |
| 7    | Ni <sub>3</sub> FeN/r-GO                                                        | 94                             | 270                            | 100           | 6         |
| 8    | Fe <sub>0.9</sub> Ni <sub>2.1</sub> S <sub>2</sub>                              | 72                             | 252 for 100 mA/cm <sup>2</sup> | 100           | 7         |



|    |                                                                      |                                    |                                   |     |    |
|----|----------------------------------------------------------------------|------------------------------------|-----------------------------------|-----|----|
| 9  | Fe-NiMoN                                                             | 264 for 100<br>mA/cm <sup>2</sup>  | 305 for 100<br>mA/cm <sup>2</sup> | 24  | 8  |
| 10 | Mo <sub>2</sub> C/Mo <sub>2</sub> N                                  | -                                  | 276 for 50<br>mA/cm <sup>2</sup>  | 40  | 9  |
| 11 | NiFe-MS/MOF                                                          | 90                                 | 243 for 100<br>mA/cm <sup>2</sup> | 27  | 10 |
| 12 | Ni <sub>7</sub> S <sub>6</sub>                                       | 70                                 | 140                               | 24  | 11 |
| 13 | P-Fe <sub>3</sub> N                                                  | 102                                | 270                               | 60  | 12 |
| 14 | F doped CoS <sub>2</sub>                                             | 112                                | 366                               | 100 | 13 |
| 15 | NiCoN                                                                | 68                                 | 247                               | 24  | 14 |
| 16 | Co <sub>4</sub> N-CeO <sub>2</sub> /Graphite                         | 24                                 | 239                               | 50  | 15 |
| 17 | W <sub>2</sub> N/WC                                                  | 148.5                              | 320                               | 10  | 16 |
| 18 | CoVFeN                                                               | -                                  | 281 for 100<br>mA/cm <sup>2</sup> | 100 | 17 |
| 19 | CuNi <sub>2</sub> N                                                  | 71.4                               | 312 for 100<br>mA/cm <sup>2</sup> | 60  | 18 |
| 20 | Co-Mo <sub>5</sub> N <sub>6</sub>                                    | 280 for 1000<br>mA/cm <sup>2</sup> | -                                 | 10  | 19 |
| 21 | P-NiCo <sub>2</sub> O <sub>4</sub> /NF                               | 55                                 | 300                               | 10  | 20 |
| 22 | Ni <sub>3</sub> P <sub>4</sub> /NiCo <sub>2</sub> O <sub>4</sub> /NF | 27                                 | -                                 | 48  | 21 |
| 23 | N-Doped<br>NiCo <sub>2</sub> O <sub>4</sub> @C                       | 42                                 | 242                               | 24  | 22 |
| 24 | N-NiMoO <sub>4</sub> /NiS <sub>2</sub>                               | 99                                 | 283                               | 20  | 23 |
| 25 | NiCo <sub>2</sub> S <sub>4</sub>                                     | 80                                 | 243                               | 24  | 24 |
| 26 | Mo-Ni <sub>3</sub> S <sub>2</sub> /Ni <sub>x</sub> P <sub>y</sub>    | 109                                | 238 at 50<br>mA/cm <sup>2</sup>   | 48  | 25 |

|    |                                                                            |                                   |                                   |     |    |
|----|----------------------------------------------------------------------------|-----------------------------------|-----------------------------------|-----|----|
|    | IrO <sub>2</sub>                                                           | -                                 | 287 at 50<br>mA/cm <sup>2</sup>   | -   |    |
|    | Pt/C                                                                       | 37                                | -                                 | -   |    |
| 27 | CDs/NiCo <sub>2</sub> S <sub>4</sub> /Ni <sub>3</sub> S <sub>2</sub>       | 116                               | 127                               | 12  | 26 |
| 28 | lily like CoNi <sub>2</sub> S <sub>4</sub>                                 | 54                                | 328 at 100<br>mA/cm <sup>2</sup>  | 10  | 27 |
| 29 | P-NiCo <sub>2</sub> S <sub>4</sub>                                         | 74                                | -                                 | -   | 28 |
| 30 | NiCo <sub>2</sub> O <sub>4</sub> /NiMoS <sub>4</sub>                       | 159                               | 310 at 20<br>mA/cm <sup>2</sup>   | 12  | 29 |
| 31 | CuCo <sub>2</sub> S <sub>4</sub> NW                                        | 65                                | 310 at 100<br>mA/cm <sup>2</sup>  | 20  | 30 |
| 32 | Ni-Co-P                                                                    | 107                               | 270                               | 20  | 31 |
| 33 | NiFe<br>LDH@Ni <sub>3</sub> N/NF                                           | 108 for 100<br>mA/cm <sup>2</sup> | 238 for 100<br>mA/cm <sup>2</sup> | 100 | 32 |
| 34 | NiCo <sub>2</sub> S <sub>4</sub> @g-C <sub>3</sub> N <sub>4</sub> -C<br>NT | 330                               | -                                 | -   | 33 |
| 35 | CoP/NiCoP                                                                  | 210 for 100<br>mA/cm <sup>2</sup> | -                                 | 24  | 34 |
|    | Pt/C                                                                       | 205 for 100<br>mA/cm <sup>2</sup> | -                                 | -   |    |
| 36 | NiMoN/NiFeN                                                                | 84 for 100<br>mA/cm <sup>2</sup>  | 277 for 100<br>mA/cm <sup>2</sup> | 48  | 35 |
|    | NiMoN                                                                      | 56 for 100<br>mA/cm <sup>2</sup>  | 350 for 100<br>mA/cm <sup>2</sup> | 48  |    |
| 37 | SS wire/Ni <sub>4</sub> Mo                                                 | 63 for 100<br>mA/cm <sup>2</sup>  | -                                 | 156 | 36 |
|    | SS wire/Ni-FeOOH                                                           | -                                 | 257 for 100<br>mA/cm <sup>2</sup> | 48  |    |

**Table S4.** Fitted data of electrochemical impedance spectra data shown in Fig. 4(i) and 5(e).

|            | Catalyst        | $R_s (\Omega)$ | $C_{\text{bulk}} (\text{mF})$ | $R_{\text{bulk}} (\Omega)$ | $C_{\text{dl}} (\text{mF})$ | $R_{\text{CT}} (\Omega)$ |
|------------|-----------------|----------------|-------------------------------|----------------------------|-----------------------------|--------------------------|
| <b>HER</b> | <b>NCMO</b>     | 1.210          | 0.001                         | 0.245                      | 0.342                       | 0.972                    |
|            | <b>NCMS</b>     | 1.032          | 0.058                         | 0.162                      | 0.254                       | 0.378                    |
|            | <b>NCMS/NiO</b> | 1.036          | 0.078                         | 0.165                      | 0.248                       | 0.249                    |
| <b>OER</b> | <b>NCMO</b>     | 0.796          | 0.024                         | 0.142                      | 0.642                       | 1.642                    |
|            | <b>NCMS</b>     | 0.789          | 0.044                         | 0.027                      | 0.744                       | 0.569                    |
|            | <b>NCMS/NiO</b> | 0.787          | 0.037                         | 0.018                      | 0.616                       | 0.331                    |

**Table S5.** Comparison of overpotential required for 100 mA/cm<sup>2</sup> current density (extracted from LSV curves) in a two electrode cell with different electrolyte concentration and temperature.

| Catalyst | Electrolyte                                   | Without iR compensation (mV) | With iR compensation (mV) |
|----------|-----------------------------------------------|------------------------------|---------------------------|
| NCMO     | 1 M KOH + DI water                            | 1040                         | 990                       |
| NCMS     | 1 M KOH + DI water                            | 665                          | 620                       |
| NCMS/NiO | 1 M KOH + DI water                            | 561                          | 517                       |
|          | 1 M KOH + Sea water                           | 527                          | 453                       |
|          | 1 M KOH + Sea water at 80 °C                  | 377                          | 305                       |
|          | 5 M KOH + Sea water at 80 °C                  | 252                          | 252                       |
|          | 5 M KOH + Sea water at 80 °C<br>After 30 days | 275                          | 275                       |

**Table S6.** Elemental analysis through SEM-EDS measurements of used NCMS/NiO anode (OER) samples in two electrode cell chronopotentiometry experiments.

| Element   | As prepared (At %) | After 14 days in DI water electrolysis (At %) | After 30 days in high temperature sea water electrolysis (At %) |
|-----------|--------------------|-----------------------------------------------|-----------------------------------------------------------------|
| <b>O</b>  | 22.37              | 24.18                                         | 35.02                                                           |
| <b>Mo</b> | 1.97               | 0.96                                          | 1.26                                                            |
| <b>S</b>  | 32.43              | 26.50                                         | 18.09                                                           |
| <b>Co</b> | 2.77               | 5.29                                          | 6.11                                                            |
| <b>Ni</b> | 40.46              | 43.07                                         | 39.51                                                           |

**Table S7.** Performance comparison between NCMS/NiO||NCMS/NiO cell and other reported non-noble metal based electrolyzers in different alkaline simulated and natural seawater. Natural seawater contains approximately 3.5 % NaCl concentration. The overpotentials are mentioned without iR compensation.

| S.No | Electrode<br>OER    HER                                                                                                                                               | Electrolyte                       | Current density<br>(mA/cm <sup>2</sup> ) | Overpotential<br>(mV) | Stability<br>(h) | Ref          |
|------|-----------------------------------------------------------------------------------------------------------------------------------------------------------------------|-----------------------------------|------------------------------------------|-----------------------|------------------|--------------|
| 1    | NiCo <sub>2</sub> S <sub>4</sub> /NiMo <sub>2</sub> S <sub>4</sub> /<br>ALD-NiO   <br>NiCo <sub>2</sub> S <sub>4</sub> /NiMo <sub>2</sub> S <sub>4</sub> /<br>ALD-NiO | 1 M KOH +<br>Seawater             | 100                                      | 527                   | 100              | This<br>work |
|      |                                                                                                                                                                       | 1 M KOH +<br>Seawater at 80<br>°C |                                          | 377                   | 100              |              |
|      |                                                                                                                                                                       | 5 M KOH +<br>Seawater at 80<br>°C |                                          | 252                   | 720              |              |

|    |                                                                                                         |                                          |      |     |      |    |
|----|---------------------------------------------------------------------------------------------------------|------------------------------------------|------|-----|------|----|
|    |                                                                                                         |                                          | 500  | 524 | 100  |    |
| 2  | NiFe/NiS <sub>x</sub>   <br>NiO/Cr <sub>2</sub> O <sub>3</sub>                                          | 1 M KOH +<br>1.5 M NaCl                  | 400  | 790 | 1000 | 37 |
|    |                                                                                                         | 1 M KOH +<br>Seawater                    | 400  | 890 | 1000 |    |
|    |                                                                                                         | 6 M KOH +<br>1.5 M NaCl at 80<br>°C      | 400  | 490 | 1000 |    |
| 3  | NiMoN/NiFeN   <br>NiMoN                                                                                 | 1 M KOH +<br>Seawater                    | 100  | 395 | -    | 35 |
|    |                                                                                                         |                                          | 500  | 751 | -    |    |
|    |                                                                                                         | 6 M KOH +<br>Seawater                    | 100  | 270 | 600  |    |
| 4  | NiFe LDH    Pt                                                                                          | 0.1 M KOH +<br>0.5 M NaCl                | 10   | 359 | 2    | 38 |
| 5  | Co <sub>2</sub> [Fe(CN) <sub>6</sub> ]   <br>NiMoS                                                      | Phosphate buffer<br>+ Seawater<br>(pH~7) | 10   | 870 | 20   | 39 |
| 6  | CoSe    CoSe                                                                                            | Natural Seawater<br>(pH~7)               | 10   | 570 | -    | 40 |
| 7  | Ni <sub>3</sub> N/Ni <sub>3</sub> S <sub>2</sub>   <br>Ni <sub>3</sub> N/Ni <sub>3</sub> S <sub>2</sub> | Natural Seawater<br>(pH~7)               | 48.3 | 570 | -    | 41 |
| 8  | S-(Ni/Fe)OOH   <br>NiCoN/Ni <sub>x</sub> P                                                              | Natural Seawater<br>(pH~7)               | 10   | 580 | 24   | 42 |
| 9  | FeOOH/NiCoOOH/<br>Graphene oxide                                                                        | 1 M KOH + 0.5<br>M NaCl at 60 °C         | 1000 | 770 | 378  | 43 |
| 10 | NiCo <sub>2</sub> S <sub>4</sub> /NiS   <br>NiCo <sub>2</sub> S <sub>4</sub> /NiS                       | 6 M KOH +<br>Seawater at 80              | 100  | 337 | 240  | 1  |

|  |  |    |      |     |   |  |
|--|--|----|------|-----|---|--|
|  |  | °C | 1000 | 743 | - |  |
|--|--|----|------|-----|---|--|

**Table S8.** Atomic percentage of each element from XPS measurements of used OER and HER NCMS/NiO electrode after industrial electrolysis for 30 days.

|            | S 2p | Ni 2p | O 2p  | Cl 2p | Ca 2p | Mg 2p |
|------------|------|-------|-------|-------|-------|-------|
| <b>OER</b> | 3.24 | 24.14 | 36.13 | 2.86  | 0.0   | 0.0   |
| <b>HER</b> | 1.93 | 22.44 | 37.25 | 0.19  | 1.44  | 0.0   |

### References:

1. S. Seenivasan, H. Jung, J. W. Han and D.-H. Kim, *Small Methods*, 2022, **6**, 2101308.
2. B. Chang, J. Yang, Y. L. Shao, L. Zhang, W. L. Fan, B. B. Huang, Y. Z. Wu and X. P. Hao, *Chemsuschem*, 2018, **11**, 3198-3207.
3. Y. Wang, Y. Sun, F. Yan, C. L. Zhu, P. Gao, X. T. Zhang and Y. J. Chen, *J. Mater. Chem. A*, 2018, **6**, 8479-8487.
4. W. Hua, H. Sun, H. Liu, Y. Li and J.-G. Wang, *Appl. Surf. Sci.*, 2021, **540**, 148407.
5. A. P. Wu, Y. Xie, H. Ma, C. G. Tian, Y. Gu, H. J. Yan, X. M. Zhang, G. Y. Yang and H. G. Fu, *Nano Energy*, 2018, **44**, 353-363.
6. Y. Gu, S. Chen, J. Ren, Y. A. Jia, C. M. Chen, S. Komarneni, D. J. Yang and X. D. Yao, *Acs Nano*, 2018, **12**, 245-253.
7. B. Fei, Z. L. Chen, J. X. Liu, H. B. Xu, X. X. Yan, H. L. Qing, M. Chen and R. B. Wu, *Adv. Energy Mater.*, 2020, **10**.
8. C. Zhu, Z. Yin, W. Lai, Y. Sun, L. Liu, X. Zhang, Y. Chen and S.-L. Chou, *Adv. Energy Mater.*, 2018, **8**, 1802327.
9. Z. K. Kou, T. T. Wang, Q. L. Gu, M. Xiong, L. R. Zheng, X. Li, Z. H. Pan, H. Chen, F. Verpoort, A. K. Cheetham, S. C. Mu and J. Wang, *Adv. Energy Mater.*, 2019, **9**.
10. M. Zhao, W. Li, J. Y. Li, W. H. Hu and C. M. Li, *Adv Sci*, 2020, **7**.
11. A. P. Tiwari, Y. Yoon, T. G. Novak, K. S. An and S. Jeon, *Acs Appl Nano Mater*, 2019, **2**, 5061-5070.
12. G. Li, J. Yu, W. Yu, L. Yang, X. Zhang, X. Liu, H. Liu and W. Zhou, *Small*, 2020, **16**, 2001980.
13. L. Lei, D. Huang, C. Zhang, R. Deng, S. Chen and Z. Li, *J. Catal.*, 2020, **385**, 129-139.
14. C. Ray, S. C. Lee, B. J. Jin, A. Kundu, J. H. Park and S. C. Jun, *J. Mater. Chem. A*, 2018, **6**, 4466-4476.
15. H. Sun, C. Tian, G. Fan, J. Qi, Z. Liu, Z. Yan, F. Cheng, J. Chen, C.-P. Li and M. Du, *Adv Funct Mater*, 2020, **30**, 1910596.
16. J. Diao, Y. Qiu, S. Liu, W. Wang, K. Chen, H. Li, W. Yuan, Y. Qu and X. Guo, *Adv. Mater.*, 2020, **32**, 1905679.
17. D. Liu, H. Ai, J. Li, M. Fang, M. Chen, D. Liu, X. Du, P. Zhou, F. Li, K. H. Lo, Y. Tang, S. Chen, L. Wang, G. Xing and H. Pan, *Adv. Energy Mater.*, 2020, **10**, 2002464.
18. Z. Wang, L. Xu, F. Huang, L. Qu, J. Li, K. A. Owusu, Z. Liu, Z. Lin, B. Xiang, X. Liu, K. Zhao, X. Liao, W. Yang, Y.-B. Cheng and L. Mai, *Adv. Energy Mater.*, 2019, **9**, 1900390.

19. F. Lin, Z. Dong, Y. Yao, L. Yang, F. Fang and L. Jiao, *Adv. Energy Mater.*, 2020, **10**, 2002176.
20. W. J. Chu, Z. J. Shi, Y. D. Hou, D. N. Ma, X. Bai, Y. F. Gao and N. J. Yang, *ACS Appl. Mater. Interfaces*, 2020, **12**, 2763-2772.
21. T. Zhang, K. N. Yang, C. Wang, S. Y. Li, Q. Q. Zhang, X. J. Chang, J. T. Li, S. M. Li, S. F. Jia, J. B. Wang and L. Fu, *Adv. Energy Mater.*, 2018, **8**.
22. Y. Ha, L. X. Shi, X. X. Yan, Z. L. Chen, Y. P. Li, W. Xu and R. B. Wu, *ACS Appl. Mater. Interfaces*, 2019, **11**, 45546-45553.
23. L. An, J. Feng, Y. Zhang, R. Wang, H. Liu, G.-C. Wang, F. Cheng and P. Xi, *Adv Funct Mater*, 2019, **29**, 1805298.
24. Z. Kang, H. Guo, J. Wu, X. Sun, Z. Zhang, Q. Liao, S. Zhang, H. Si, P. Wu, L. Wang and Y. Zhang, *Adv Funct Mater*, 2019, **29**, 1807031.
25. X. Luo, P. X. Ji, P. Y. Wang, R. L. Cheng, D. Chen, C. Lin, J. A. Zhang, J. W. He, Z. H. Shi, N. Li, S. Q. Xiao and S. C. Mu, *Adv. Energy Mater.*, 2020, **10**.
26. X. Y. Zhao, H. Liu, Y. Rao, X. X. Li, J. L. Wang, G. S. Xia and M. B. Wu, *ACS Sustain. Chem. Eng.*, 2019, **7**, 2610-2618.
27. J. W. Li, Q. N. Zhuang, P. M. Xu, D. W. Zhang, L. C. Wei and D. S. Yuan, *Chinese J Catal*, 2018, **39**, 1403-1410.
28. H. H. Gu, W. Fan and T. X. Liu, *Nanoscale Horiz.*, 2017, **2**, 277-283.
29. D. Zhao, M. Dai, H. Liu, K. Chen, X. Zhu, D. Xue, X. Wu and J. Liu, *Adv. Mater. Interfaces*, 2019, **6**, 1901308.
30. S. Czioska, J. Wang, X. Teng and Z. Chen, *ACS Sustain. Chem. Eng.*, 2018, **6**, 11877-11883.
31. E. Hu, Y. Feng, J. Nai, D. Zhao, Y. Hu and X. W. Lou, *Energy Environ. Sci.*, 2018, **11**, 872-880.
32. B. Wang, S. Jiao, Z. Wang, M. Lu, D. Chen, Y. Kang, G. Pang and S. Feng, *J. Mater. Chem. A*, 2020, **8**, 17202-17211.
33. X. P. Han, W. Zhang, X. Y. Ma, C. Zhong, N. Q. Zhao, W. B. Hu and Y. D. Deng, *Adv. Mater.*, 2019, **31**.
34. Y. Lin, K. A. Sun, S. J. Liu, X. M. Chen, Y. S. Cheng, W. O. Cheong, Z. Chen, L. R. Zheng, J. Zhang, X. Y. Li, Y. Pan and C. Chen, *Adv. Energy Mater.*, 2019, **9**.
35. L. Yu, Q. Zhu, S. Song, B. McElhenny, D. Wang, C. Wu, Z. Qin, J. Bao, Y. Yu, S. Chen and Z. Ren, *Nat. Commun.*, 2019, **10**, 5106.
36. V. R. Jothi, K. Karuppasamy, T. Maiyalagan, H. Rajan, C. Y. Jung and S. C. Yi, *Adv. Energy Mater.*, 2020, **10**.
37. Y. Kuang, M. J. Kenney, Y. Meng, W.-H. Hung, Y. Liu, J. E. Huang, R. Prasanna, P. Li, Y. Li, L. Wang, M.-C. Lin, M. D. McGehee, X. Sun and H. Dai, *Proceedings of the National Academy of Sciences*, 2019, **116**, 6624-6629.
38. F. Dionigi, T. Reier, Z. Pawolek, M. Glicch and P. Strasser, *Chemsuschem*, 2016, **9**, 962-972.
39. S. H. Hsu, J. W. Miao, L. P. Zhang, J. J. Gao, H. M. Wang, H. B. Tao, S. F. Hung, A. Vasileff, S. Z. Qiao and B. Liu, *Adv. Mater.*, 2018, **30**.
40. Y. Zhao, B. Jin, Y. Zheng, H. Jin, Y. Jiao and S.-Z. Qiao, *Adv. Energy Mater.*, 2018, **8**, 1801926.
41. Y. Zhao, B. Jin, A. Vasileff, Y. Jiao and S.-Z. Qiao, *J. Mater. Chem. A*, 2019, **7**, 8117-8121.
42. L. Yu, L. Wu, S. Song, B. McElhenny, F. Zhang, S. Chen and Z. Ren, *Acs Energy Lett*, 2020, **5**, 2681-2689.
43. A. R. Jadhav, A. Kumar, J. Lee, T. Yang, S. Na, J. Lee, Y. Luo, X. Liu, Y. Hwang, Y. Liu and H. Lee, *J. Mater. Chem. A*, 2020, **8**, 24501-24514.
